# Supplementary material
Source: Research Square preprint supplement (doi:10.21203/rs.3.rs-8827995/v1)
Supplement: Supplementary file 1 [file 273dca58b3bade2dff2dfedb.docx]

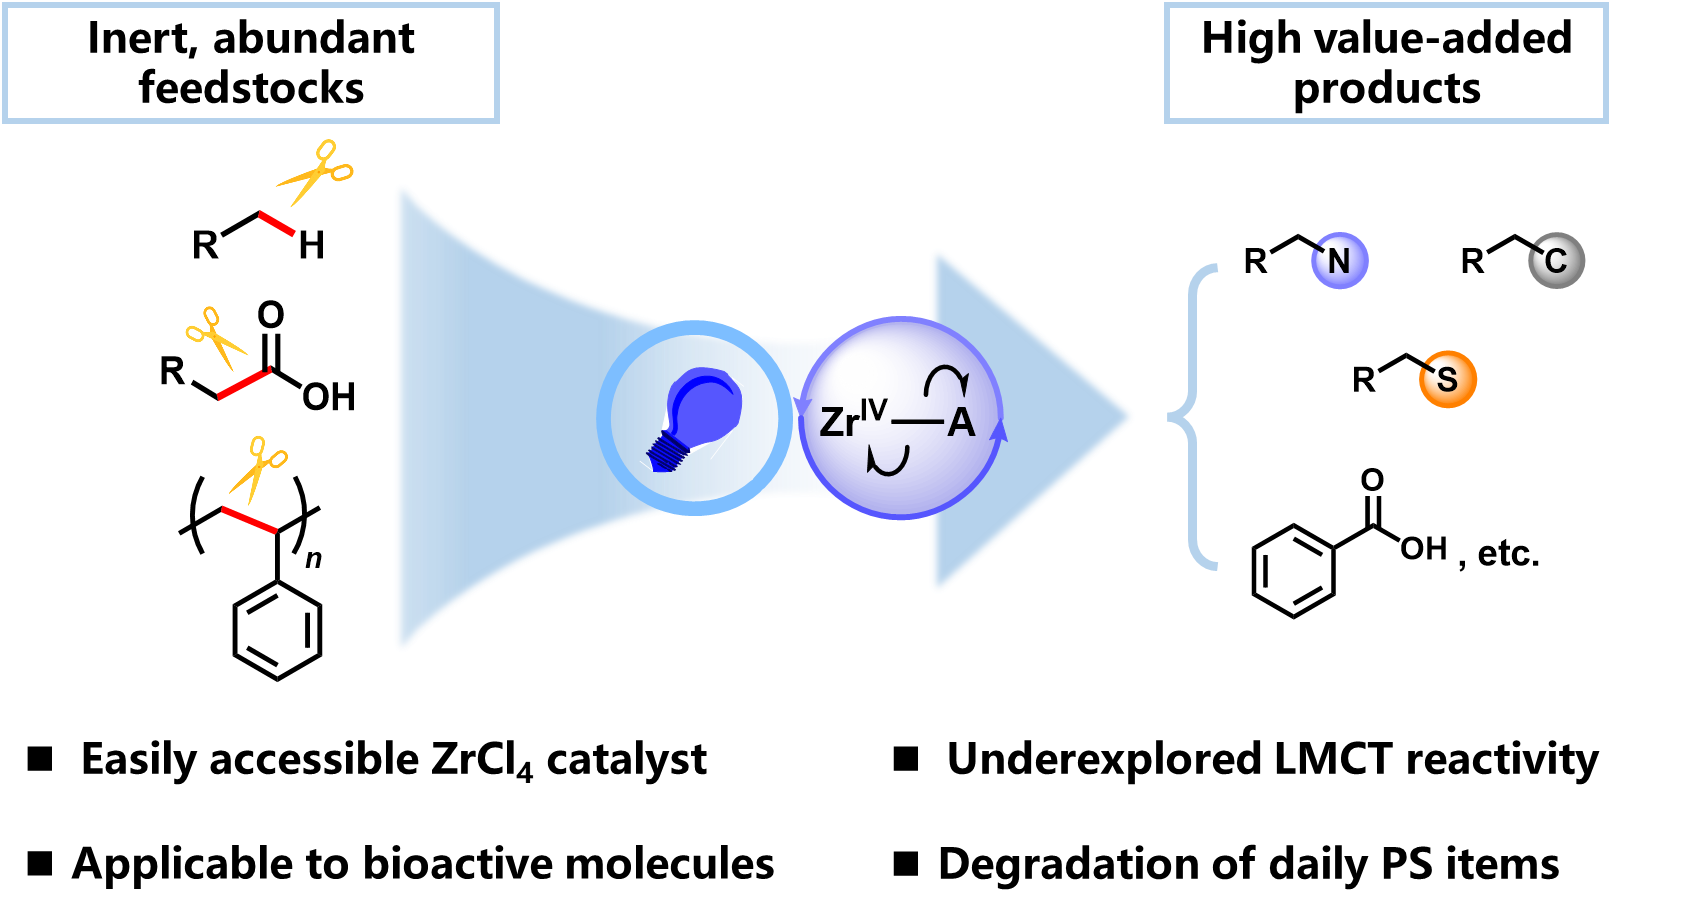


Leveraging zirconium for inert bond activation has long been a formidable challenge. Now it has been shown that under light irradiation, the easily accessible ZrCl4 can furnish the direct functionalization of three types of abundant yet highly inert substrates via the underexplored LMCT reactivity.
